# Supplementary material
Source: MDPI journal article supplement (https://www.mdpi.com/2073-4352/2/1/105)
Supplement: s1 [file s1]

data_MF08CM

_publ_contact_author_name        'K\"ockerling, Martin'

# contact author for X-ray structure 

_publ_contact_author_address     
;
Universit\"at Rostock
Institut f\"ur Chemie
Abt. Anorganische Chemie-Festk\"orperchemie
Albert-Einstein-Str. 3a
D-18059 Rostock
Germany
;

_publ_contact_author_email       'Martin.Koeckerling@uni-rostock.de'
_publ_contact_author_phone       '++49 381 6390'
_publ_contact_author_fax         '++49 381 6382'

loop_
_publ_author_name
_publ_author_address

'Mamat, Constantin'
;
Helholtz-Zentrum Dresden-Rossendorf
Institut f\"ur Radiopharmazie
P.O. Box 50 01 19
D-01314 Dresden
Germany
;

'Peppel, Tim'
;
Universit\"at Rostock
Institut f\"ur Chemie
Abt. Anorganische Festk\"orperchemie
Albert-Einstein-Str. 3a
D-18059 Rostock
Germany
;

'K\"ockerling, Martin'
;
Universit\"at Rostock
Institut f\"ur Chemie
Abt. Anorganische Festk\"orperchemie
Albert-Einstein-Str. 3a
D-18059 Rostock
Germany
;

_audit_creation_method             'ct.exe (M. K\"ockerling, 1996)'

_chemical_name_systematic
;
1,2:5,6-Di-O-isopropylidene-3-O-tosyl-\a-D-glucofuranose 
;

_chemical_formula_moiety     'C19 H26 O8 S'
_chemical_formula_sum         'C19 H26 O8 S'
_chemical_formula_weight          414.46
 
loop_
 _atom_type_symbol
 _atom_type_description
 _atom_type_scat_dispersion_real
 _atom_type_scat_dispersion_imag
 _atom_type_scat_source
 'C'  'C'   0.0034   0.0017
 'International Tables Vol C Tables 4.2.6.8 and 6.1.1.4'
 'H'  'H'   0.0000   0.0000
 'International Tables Vol C Tables 4.2.6.8 and 6.1.1.4'
 'O'  'O'   0.0114   0.0062
 'International Tables Vol C Tables 4.2.6.8 and 6.1.1.4'
 'S'  'S'   0.1265   0.1256
 'International Tables Vol C Tables 4.2.6.8 and 6.1.1.4'
 
_symmetry_cell_setting            Orthorhombic
_symmetry_space_group_name_H-M    'P 21 21 21'
 
loop_
 _symmetry_equiv_pos_as_xyz
 'x, y, z'
 '-x+1/2, -y, z+1/2'
 '-x, y+1/2, -z+1/2'
 'x+1/2, -y+1/2, -z'
 
_cell_length_a                    9.7945(7)
_cell_length_b                    10.1945(7)
_cell_length_c                    21.306(1)
_cell_angle_alpha                 90.00
_cell_angle_beta                  90.00
_cell_angle_gamma                 90.00
_cell_volume                      2127.4(2)
_cell_formula_units_Z             4
_cell_measurement_temperature     173(2)
_cell_measurement_reflns_used     6725
_cell_measurement_theta_min       2.88
_cell_measurement_theta_max       30.39
 
_exptl_crystal_description        plate
_exptl_crystal_colour             colourless
_exptl_crystal_size_max           0.70
_exptl_crystal_size_mid           0.22
_exptl_crystal_size_min           0.10
_exptl_crystal_density_diffrn     1.294
_exptl_crystal_density_method     'not measured'
_exptl_crystal_F_000              880
_exptl_absorpt_coefficient_mu     0.193
_exptl_absorpt_correction_type    multi-scan
_exptl_absorpt_correction_T_min   0.8767
_exptl_absorpt_correction_T_max   0.9810
_exptl_absorpt_process_details    'Bruker-Nonius SADABS'
 
 
_diffrn_ambient_temperature       173(2)
_diffrn_radiation_wavelength      0.71073
_diffrn_radiation_type            MoK\a
_diffrn_radiation_source          'fine-focus sealed tube'
_diffrn_radiation_monochromator   graphite
_diffrn_measurement_device_type   'CCD area detector'
_diffrn_measurement_method        'phi and omega scans'
_diffrn_reflns_number             18550
_diffrn_reflns_av_R_equivalents   0.0517
_diffrn_reflns_av_sigmaI/netI     0.0507
_diffrn_reflns_limit_h_min        -13
_diffrn_reflns_limit_h_max        14
_diffrn_reflns_limit_k_min        -14
_diffrn_reflns_limit_k_max        13
_diffrn_reflns_limit_l_min        -30
_diffrn_reflns_limit_l_max        17
_diffrn_reflns_theta_min          4.36
_diffrn_reflns_theta_max          30.60
_reflns_number_total              6469
_reflns_number_gt                 5405
_reflns_threshold_expression      >2sigma(I)
 
_computing_data_collection        'Bruker SMART'
_computing_cell_refinement        'Bruker SMART'
_computing_data_reduction         'Bruker SAINT'
_computing_structure_solution     'SHELXS-97 (Sheldrick, 1990)'
_computing_structure_refinement   'SHELXL-97 (Sheldrick, 1997)'
_computing_molecular_graphics     'Bruker SHELXTL'
_computing_publication_material   'Bruker SHELXTL'
 
_refine_special_details
;
 Refinement of F^2^ against ALL reflections.  The weighted R-factor wR and
 goodness of fit S are based on F^2^, conventional R-factors R are based
 on F, with F set to zero for negative F^2^. The threshold expression of
 F^2^ > 2sigma(F^2^) is used only for calculating R-factors(gt) etc. and is
 not relevant to the choice of reflections for refinement.  R-factors based
 on F^2^ are statistically about twice as large as those based on F, and R-
 factors based on ALL data will be even larger.
;
 
_refine_ls_structure_factor_coef  Fsqd
_refine_ls_matrix_type            full
_refine_ls_weighting_scheme       calc
_refine_ls_weighting_details
 'calc w=1/[\s^2^(Fo^2^)+(0.0691P)^2^+0.5161P] where P=(Fo^2^+2Fc^2^)/3'
_atom_sites_solution_primary      direct
_atom_sites_solution_secondary    difmap
_atom_sites_solution_hydrogens    geom
_refine_ls_hydrogen_treatment     constr
_refine_ls_extinction_method      SHELXL
_refine_ls_extinction_coef        0.004(3)
_refine_ls_extinction_expression
 'Fc^*^=kFc[1+0.001xFc^2^\l^3^/sin(2\q)]^-1/4^'
_refine_ls_abs_structure_details
 'Flack H D (1983), Acta Cryst. A39, 876-881'
_refine_ls_abs_structure_Flack    0.00(8)
_refine_ls_number_reflns          6469
_refine_ls_number_parameters      254
_refine_ls_number_restraints      0
_refine_ls_R_factor_all           0.0660
_refine_ls_R_factor_gt            0.0509
_refine_ls_wR_factor_ref          0.1346
_refine_ls_wR_factor_gt           0.1228
_refine_ls_goodness_of_fit_ref    1.033
_refine_ls_restrained_S_all       1.033
_refine_ls_shift/su_max           0.000
_refine_ls_shift/su_mean          0.000
 
_diffrn_measured_fraction_theta_max    0.988
_diffrn_reflns_theta_full              30.60
_diffrn_measured_fraction_theta_full   0.988
_refine_diff_density_max    0.413
_refine_diff_density_min   -0.377
_refine_diff_density_rms    0.066

loop_
 _atom_site_label
 _atom_site_type_symbol
 _atom_site_fract_x
 _atom_site_fract_y
 _atom_site_fract_z
 _atom_site_U_iso_or_equiv
 _atom_site_adp_type
 _atom_site_occupancy
 _atom_site_symmetry_multiplicity
 _atom_site_calc_flag
 _atom_site_refinement_flags
 _atom_site_disorder_assembly
 _atom_site_disorder_group
O1 O 0.50196(14) 0.68218(13) 0.29699(7) 0.0351(3) Uani 1 1 d . . .
C1 C 0.36207(19) 0.66420(16) 0.30945(9) 0.0299(3) Uani 1 1 d . . .
H1A H 0.3091 0.7464 0.3014 0.036 Uiso 1 1 calc R . .
C2 C 0.31164(17) 0.55095(17) 0.26777(8) 0.0285(3) Uani 1 1 d . . .
H2A H 0.2260 0.5722 0.2443 0.034 Uiso 1 1 calc R . .
C3 C 0.43306(18) 0.52309(16) 0.22490(8) 0.0281(3) Uani 1 1 d . . .
H3A H 0.4399 0.4286 0.2127 0.034 Uiso 1 1 calc R . .
C4 C 0.55287(17) 0.56850(16) 0.26450(9) 0.0285(3) Uani 1 1 d . . .
H4A H 0.5766 0.4988 0.2957 0.034 Uiso 1 1 calc R . .
C5 C 0.67974(19) 0.60982(18) 0.22977(10) 0.0351(4) Uani 1 1 d . . .
H5A H 0.6584 0.6829 0.2000 0.042 Uiso 1 1 calc R . .
C6 C 0.7989(2) 0.6465(3) 0.27105(14) 0.0571(7) Uani 1 1 d . . .
H6A H 0.8008 0.7422 0.2788 0.069 Uiso 1 1 calc R . .
H6B H 0.7938 0.6003 0.3119 0.069 Uiso 1 1 calc R . .
O2 O 0.34272(19) 0.61933(15) 0.37122(7) 0.0462(4) Uani 1 1 d . . .
O3 O 0.29650(15) 0.44442(12) 0.30980(7) 0.0361(3) Uani 1 1 d . . .
C7 C 0.2685(2) 0.4985(2) 0.37023(10) 0.0388(4) Uani 1 1 d . . .
C8 C 0.3266(3) 0.4094(3) 0.41981(13) 0.0656(8) Uani 1 1 d . . .
H8A H 0.4240 0.3953 0.4117 0.098 Uiso 1 1 calc R . .
H8B H 0.2788 0.3250 0.4188 0.098 Uiso 1 1 calc R . .
H8C H 0.3150 0.4499 0.4612 0.098 Uiso 1 1 calc R . .
C9 C 0.1170(3) 0.5255(3) 0.37751(13) 0.0532(6) Uani 1 1 d . . .
H9A H 0.0864 0.5836 0.3436 0.080 Uiso 1 1 calc R . .
H9B H 0.1003 0.5678 0.4181 0.080 Uiso 1 1 calc R . .
H9C H 0.0664 0.4427 0.3755 0.080 Uiso 1 1 calc R . .
O4 O 0.73124(13) 0.49969(13) 0.19657(7) 0.0382(3) Uani 1 1 d . . .
O5 O 0.91374(17) 0.6069(2) 0.23733(11) 0.0674(6) Uani 1 1 d . . .
C10 C 0.87560(19) 0.5197(2) 0.18930(12) 0.0414(5) Uani 1 1 d . . .
C11 C 0.9453(3) 0.3935(3) 0.1962(3) 0.119(2) Uani 1 1 d . . .
H11A H 0.9211 0.3544 0.2367 0.179 Uiso 1 1 calc R . .
H11B H 1.0443 0.4070 0.1943 0.179 Uiso 1 1 calc R . .
H11C H 0.9172 0.3346 0.1622 0.179 Uiso 1 1 calc R . .
C12 C 0.9053(3) 0.5904(6) 0.12808(17) 0.0957(14) Uani 1 1 d . . .
H12A H 0.8596 0.6759 0.1281 0.144 Uiso 1 1 calc R . .
H12B H 0.8715 0.5378 0.0929 0.144 Uiso 1 1 calc R . .
H12C H 1.0040 0.6031 0.1237 0.144 Uiso 1 1 calc R . .
O6 O 0.42133(16) 0.60996(14) 0.17121(6) 0.0378(3) Uani 1 1 d . . .
O7 O 0.27210(16) 0.4424(2) 0.12433(8) 0.0562(5) Uani 1 1 d . . .
O8 O 0.2830(3) 0.6686(2) 0.08362(9) 0.0799(7) Uani 1 1 d . . .
S1 S 0.34950(6) 0.55728(6) 0.10935(2) 0.04537(15) Uani 1 1 d . . .
C13 C 0.4873(2) 0.51519(19) 0.06128(8) 0.0337(4) Uani 1 1 d . . .
C14 C 0.5417(3) 0.6067(2) 0.02010(10) 0.0436(5) Uani 1 1 d . . .
H14A H 0.5041 0.6925 0.0175 0.052 Uiso 1 1 calc R . .
C15 C 0.6509(3) 0.5715(3) -0.01701(10) 0.0507(6) Uani 1 1 d . . .
H15A H 0.6886 0.6339 -0.0452 0.061 Uiso 1 1 calc R . .
C16 C 0.7066(2) 0.4470(3) -0.01392(10) 0.0487(5) Uani 1 1 d . . .
C17 C 0.6510(3) 0.3570(2) 0.02757(10) 0.0459(5) Uani 1 1 d . . .
H17A H 0.6884 0.2712 0.0301 0.055 Uiso 1 1 calc R . .
C18 C 0.5413(2) 0.3907(2) 0.06549(10) 0.0387(4) Uani 1 1 d . . .
H18A H 0.5038 0.3287 0.0940 0.046 Uiso 1 1 calc R . .
C19 C 0.8267(3) 0.4083(5) -0.05383(15) 0.0820(11) Uani 1 1 d . . .
H19A H 0.8540 0.4827 -0.0801 0.123 Uiso 1 1 calc R . .
H19B H 0.8011 0.3342 -0.0807 0.123 Uiso 1 1 calc R . .
H19C H 0.9030 0.3827 -0.0267 0.123 Uiso 1 1 calc R . .
 
loop_
 _atom_site_aniso_label
 _atom_site_aniso_U_11
 _atom_site_aniso_U_22
 _atom_site_aniso_U_33
 _atom_site_aniso_U_23
 _atom_site_aniso_U_13
 _atom_site_aniso_U_12
O1 0.0292(6) 0.0295(6) 0.0466(8) -0.0111(5) 0.0075(6) -0.0051(5)
C1 0.0268(8) 0.0259(7) 0.0369(8) -0.0032(6) 0.0048(7) 0.0022(6)
C2 0.0228(7) 0.0280(7) 0.0346(8) -0.0043(7) -0.0006(6) -0.0003(6)
C3 0.0279(8) 0.0245(7) 0.0320(8) -0.0021(6) -0.0013(7) 0.0047(6)
C4 0.0226(7) 0.0246(7) 0.0382(8) -0.0034(6) -0.0008(7) 0.0014(6)
C5 0.0263(9) 0.0276(8) 0.0514(11) -0.0070(8) 0.0075(8) 0.0007(6)
C6 0.0311(10) 0.0651(15) 0.0751(17) -0.0316(13) 0.0067(11) -0.0152(10)
O2 0.0594(10) 0.0452(8) 0.0342(7) -0.0068(6) 0.0087(7) -0.0173(8)
O3 0.0373(7) 0.0258(5) 0.0452(7) 0.0003(6) 0.0043(6) -0.0059(5)
C7 0.0386(10) 0.0382(9) 0.0397(10) 0.0045(8) 0.0055(9) -0.0057(8)
C8 0.0670(19) 0.0720(17) 0.0578(15) 0.0268(13) -0.0060(14) -0.0078(14)
C9 0.0432(12) 0.0597(14) 0.0567(14) 0.0076(11) 0.0170(11) -0.0017(10)
O4 0.0191(6) 0.0368(6) 0.0586(9) -0.0156(6) 0.0030(6) 0.0013(5)
O5 0.0247(7) 0.0910(14) 0.0865(14) -0.0396(12) 0.0019(8) -0.0101(9)
C10 0.0192(8) 0.0380(9) 0.0669(13) -0.0073(9) -0.0011(9) 0.0004(7)
C11 0.0286(13) 0.0429(14) 0.286(7) 0.003(2) 0.014(2) 0.0102(10)
C12 0.0382(14) 0.174(4) 0.074(2) 0.021(3) 0.0050(14) -0.019(2)
O6 0.0443(8) 0.0386(7) 0.0304(6) 0.0001(5) 0.0019(6) 0.0087(6)
O7 0.0278(7) 0.0923(13) 0.0487(9) -0.0126(9) -0.0006(6) -0.0121(9)
O8 0.0826(15) 0.1017(16) 0.0553(11) 0.0031(11) -0.0133(10) 0.0607(14)
S1 0.0346(2) 0.0670(3) 0.0345(2) -0.0024(2) -0.0054(2) 0.0196(2)
C13 0.0360(9) 0.0407(9) 0.0243(7) 0.0010(7) -0.0016(7) 0.0029(8)
C14 0.0617(14) 0.0333(9) 0.0358(9) 0.0020(7) -0.0082(10) -0.0047(9)
C15 0.0582(14) 0.0570(13) 0.0369(9) 0.0050(9) 0.0011(10) -0.0251(12)
C16 0.0386(11) 0.0738(15) 0.0338(9) -0.0045(10) 0.0054(8) -0.0061(11)
C17 0.0461(12) 0.0498(12) 0.0419(10) -0.0002(9) 0.0065(10) 0.0114(10)
C18 0.0385(10) 0.0413(9) 0.0364(9) 0.0098(8) 0.0062(8) 0.0064(8)
C19 0.0555(18) 0.134(3) 0.0563(15) -0.0068(18) 0.0233(14) 0.0007(19)
 
_geom_special_details
;
 All esds (except the esd in the dihedral angle between two l.s. planes)
 are estimated using the full covariance matrix.  The cell esds are taken
 into account individually in the estimation of esds in distances, angles
 and torsion angles; correlations between esds in cell parameters are only
 used when they are defined by crystal symmetry.  An approximate (isotropic)
 treatment of cell esds is used for estimating esds involving l.s. planes.
;
 
loop_
 _geom_bond_atom_site_label_1
 _geom_bond_atom_site_label_2
 _geom_bond_distance
 _geom_bond_site_symmetry_2
O1 C1 1.408(2) .  
O1 C4 1.439(2) .  
C1 O2 1.406(2) .  
C1 C2 1.538(2) .  
C1 H1A 1.0000 .  
C2 O3 1.415(2) .  
C2 C3 1.526(2) .  
C2 H2A 1.0000 .  
C3 O6 1.451(2) .  
C3 C4 1.518(2) .  
C3 H3A 1.0000 .  
C4 C5 1.506(3) .  
C4 H4A 1.0000 .  
C5 O4 1.420(2) .  
C5 C6 1.508(3) .  
C5 H5A 1.0000 .  
C6 O5 1.394(3) .  
C6 H6A 0.9900 .  
C6 H6B 0.9900 .  
O2 C7 1.431(3) .  
O3 C7 1.427(3) .  
C7 C8 1.505(3) .  
C7 C9 1.517(3) .  
C8 H8A 0.9800 .  
C8 H8B 0.9800 .  
C8 H8C 0.9800 .  
C9 H9A 0.9800 .  
C9 H9B 0.9800 .  
C9 H9C 0.9800 .  
O4 C10 1.437(2) .  
O5 C10 1.406(3) .  
C10 C11 1.464(3) .  
C10 C12 1.518(4) .  
C11 H11A 0.9800 .  
C11 H11B 0.9800 .  
C11 H11C 0.9800 .  
C12 H12A 0.9800 .  
C12 H12B 0.9800 .  
C12 H12C 0.9800 .  
O6 S1 1.5877(15) .  
O7 S1 1.431(2) .  
O8 S1 1.418(2) .  
S1 C13 1.748(2) .  
C13 C18 1.377(3) .  
C13 C14 1.387(3) .  
C14 C15 1.378(4) .  
C14 H14A 0.9500 .  
C15 C16 1.383(4) .  
C15 H15A 0.9500 .  
C16 C17 1.386(3) .  
C16 C19 1.504(4) .  
C17 C18 1.388(3) .  
C17 H17A 0.9500 .  
C18 H18A 0.9500 .  
C19 H19A 0.9800 .  
C19 H19B 0.9800 .  
C19 H19C 0.9800 .  
 
loop_
 _geom_angle_atom_site_label_1
 _geom_angle_atom_site_label_2
 _geom_angle_atom_site_label_3
 _geom_angle
 _geom_angle_site_symmetry_1
 _geom_angle_site_symmetry_3
C1 O1 C4 108.85(13) . .  
O2 C1 O1 110.49(16) . .  
O2 C1 C2 104.65(14) . .  
O1 C1 C2 107.55(14) . .  
O2 C1 H1A 111.3 . .  
O1 C1 H1A 111.3 . .  
C2 C1 H1A 111.3 . .  
O3 C2 C3 108.51(14) . .  
O3 C2 C1 104.14(14) . .  
C3 C2 C1 103.59(14) . .  
O3 C2 H2A 113.3 . .  
C3 C2 H2A 113.3 . .  
C1 C2 H2A 113.3 . .  
O6 C3 C4 108.26(14) . .  
O6 C3 C2 107.25(13) . .  
C4 C3 C2 102.30(14) . .  
O6 C3 H3A 112.8 . .  
C4 C3 H3A 112.8 . .  
C2 C3 H3A 112.8 . .  
O1 C4 C5 107.27(14) . .  
O1 C4 C3 104.19(13) . .  
C5 C4 C3 116.75(16) . .  
O1 C4 H4A 109.4 . .  
C5 C4 H4A 109.4 . .  
C3 C4 H4A 109.4 . .  
O4 C5 C4 108.46(14) . .  
O4 C5 C6 102.20(16) . .  
C4 C5 C6 114.91(19) . .  
O4 C5 H5A 110.3 . .  
C4 C5 H5A 110.3 . .  
C6 C5 H5A 110.3 . .  
O5 C6 C5 104.61(19) . .  
O5 C6 H6A 110.8 . .  
C5 C6 H6A 110.8 . .  
O5 C6 H6B 110.8 . .  
C5 C6 H6B 110.8 . .  
H6A C6 H6B 108.9 . .  
C1 O2 C7 109.55(14) . .  
C2 O3 C7 107.14(14) . .  
O3 C7 O2 104.36(15) . .  
O3 C7 C8 109.1(2) . .  
O2 C7 C8 108.5(2) . .  
O3 C7 C9 110.54(19) . .  
O2 C7 C9 109.81(19) . .  
C8 C7 C9 114.1(2) . .  
C7 C8 H8A 109.5 . .  
C7 C8 H8B 109.5 . .  
H8A C8 H8B 109.5 . .  
C7 C8 H8C 109.5 . .  
H8A C8 H8C 109.5 . .  
H8B C8 H8C 109.5 . .  
C7 C9 H9A 109.5 . .  
C7 C9 H9B 109.5 . .  
H9A C9 H9B 109.5 . .  
C7 C9 H9C 109.5 . .  
H9A C9 H9C 109.5 . .  
H9B C9 H9C 109.5 . .  
C5 O4 C10 106.91(14) . .  
C6 O5 C10 110.09(16) . .  
O5 C10 O4 105.83(17) . .  
O5 C10 C11 111.0(3) . .  
O4 C10 C11 108.84(19) . .  
O5 C10 C12 105.9(2) . .  
O4 C10 C12 110.4(2) . .  
C11 C10 C12 114.5(3) . .  
C10 C11 H11A 109.5 . .  
C10 C11 H11B 109.5 . .  
H11A C11 H11B 109.5 . .  
C10 C11 H11C 109.5 . .  
H11A C11 H11C 109.5 . .  
H11B C11 H11C 109.5 . .  
C10 C12 H12A 109.5 . .  
C10 C12 H12B 109.5 . .  
H12A C12 H12B 109.5 . .  
C10 C12 H12C 109.5 . .  
H12A C12 H12C 109.5 . .  
H12B C12 H12C 109.5 . .  
C3 O6 S1 118.89(12) . .  
O8 S1 O7 119.85(15) . .  
O8 S1 O6 104.70(11) . .  
O7 S1 O6 109.04(9) . .  
O8 S1 C13 108.92(12) . .  
O7 S1 C13 109.81(11) . .  
O6 S1 C13 103.14(9) . .  
C18 C13 C14 120.9(2) . .  
C18 C13 S1 118.96(15) . .  
C14 C13 S1 120.12(16) . .  
C15 C14 C13 119.0(2) . .  
C15 C14 H14A 120.5 . .  
C13 C14 H14A 120.5 . .  
C14 C15 C16 121.2(2) . .  
C14 C15 H15A 119.4 . .  
C16 C15 H15A 119.4 . .  
C15 C16 C17 118.8(2) . .  
C15 C16 C19 121.5(3) . .  
C17 C16 C19 119.6(3) . .  
C16 C17 C18 120.8(2) . .  
C16 C17 H17A 119.6 . .  
C18 C17 H17A 119.6 . .  
C13 C18 C17 119.15(19) . .  
C13 C18 H18A 120.4 . .  
C17 C18 H18A 120.4 . .  
C16 C19 H19A 109.5 . .  
C16 C19 H19B 109.5 . .  
H19A C19 H19B 109.5 . .  
C16 C19 H19C 109.5 . .  
H19A C19 H19C 109.5 . .  
H19B C19 H19C 109.5 . .  


# eof 
